# Supplementary material
Source: Springer Nature journal article supplement (https://www.springermedizin.de/resource/supplementary/12937_2013_757_MOESM3_ESM.pdf/25653992)
Supplement: MOESM3 [file 25653992]

## Gene targets of PPAR $\alpha$ , $\beta/\delta$ , and $\gamma$

### PPAR $\alpha$

- $\beta$ -oxidation pathway (acyl-CoA oxidase, thiolase)
- Sterol 12-hydroxylase (CYP8B1)
- Fatty acid transport protein (FATP)
- Fatty acid translocase (FAT/CD36)
- Lipoprotein lipase
- Apolipoprotein A-I and A-II

### PPAR $\beta/\delta$

- Genes involved in lipid uptake, metabolism and efflux (repressed by PPARs)

### PPAR $\gamma$

- Fatty acid-binding protein (aP2)
- Fatty acid transport protein (FATP)
- Fatty acid translocase (FAT/CD36)
